# Supplementary material for: Epigenomic mapping identifies an enhancer repertoire that regulates cell identity in bladder cancer through distinct transcription factor networks
Source: PubMed Central journal article supplement (PMC10162941; doi:10.1038/s41388-023-02662-1), 2023-03-22
Supplement: 41388_2023_2662_MOESM2_ESM.pdf [file 41388_2023_2662_MOESM2_ESM.pdf]

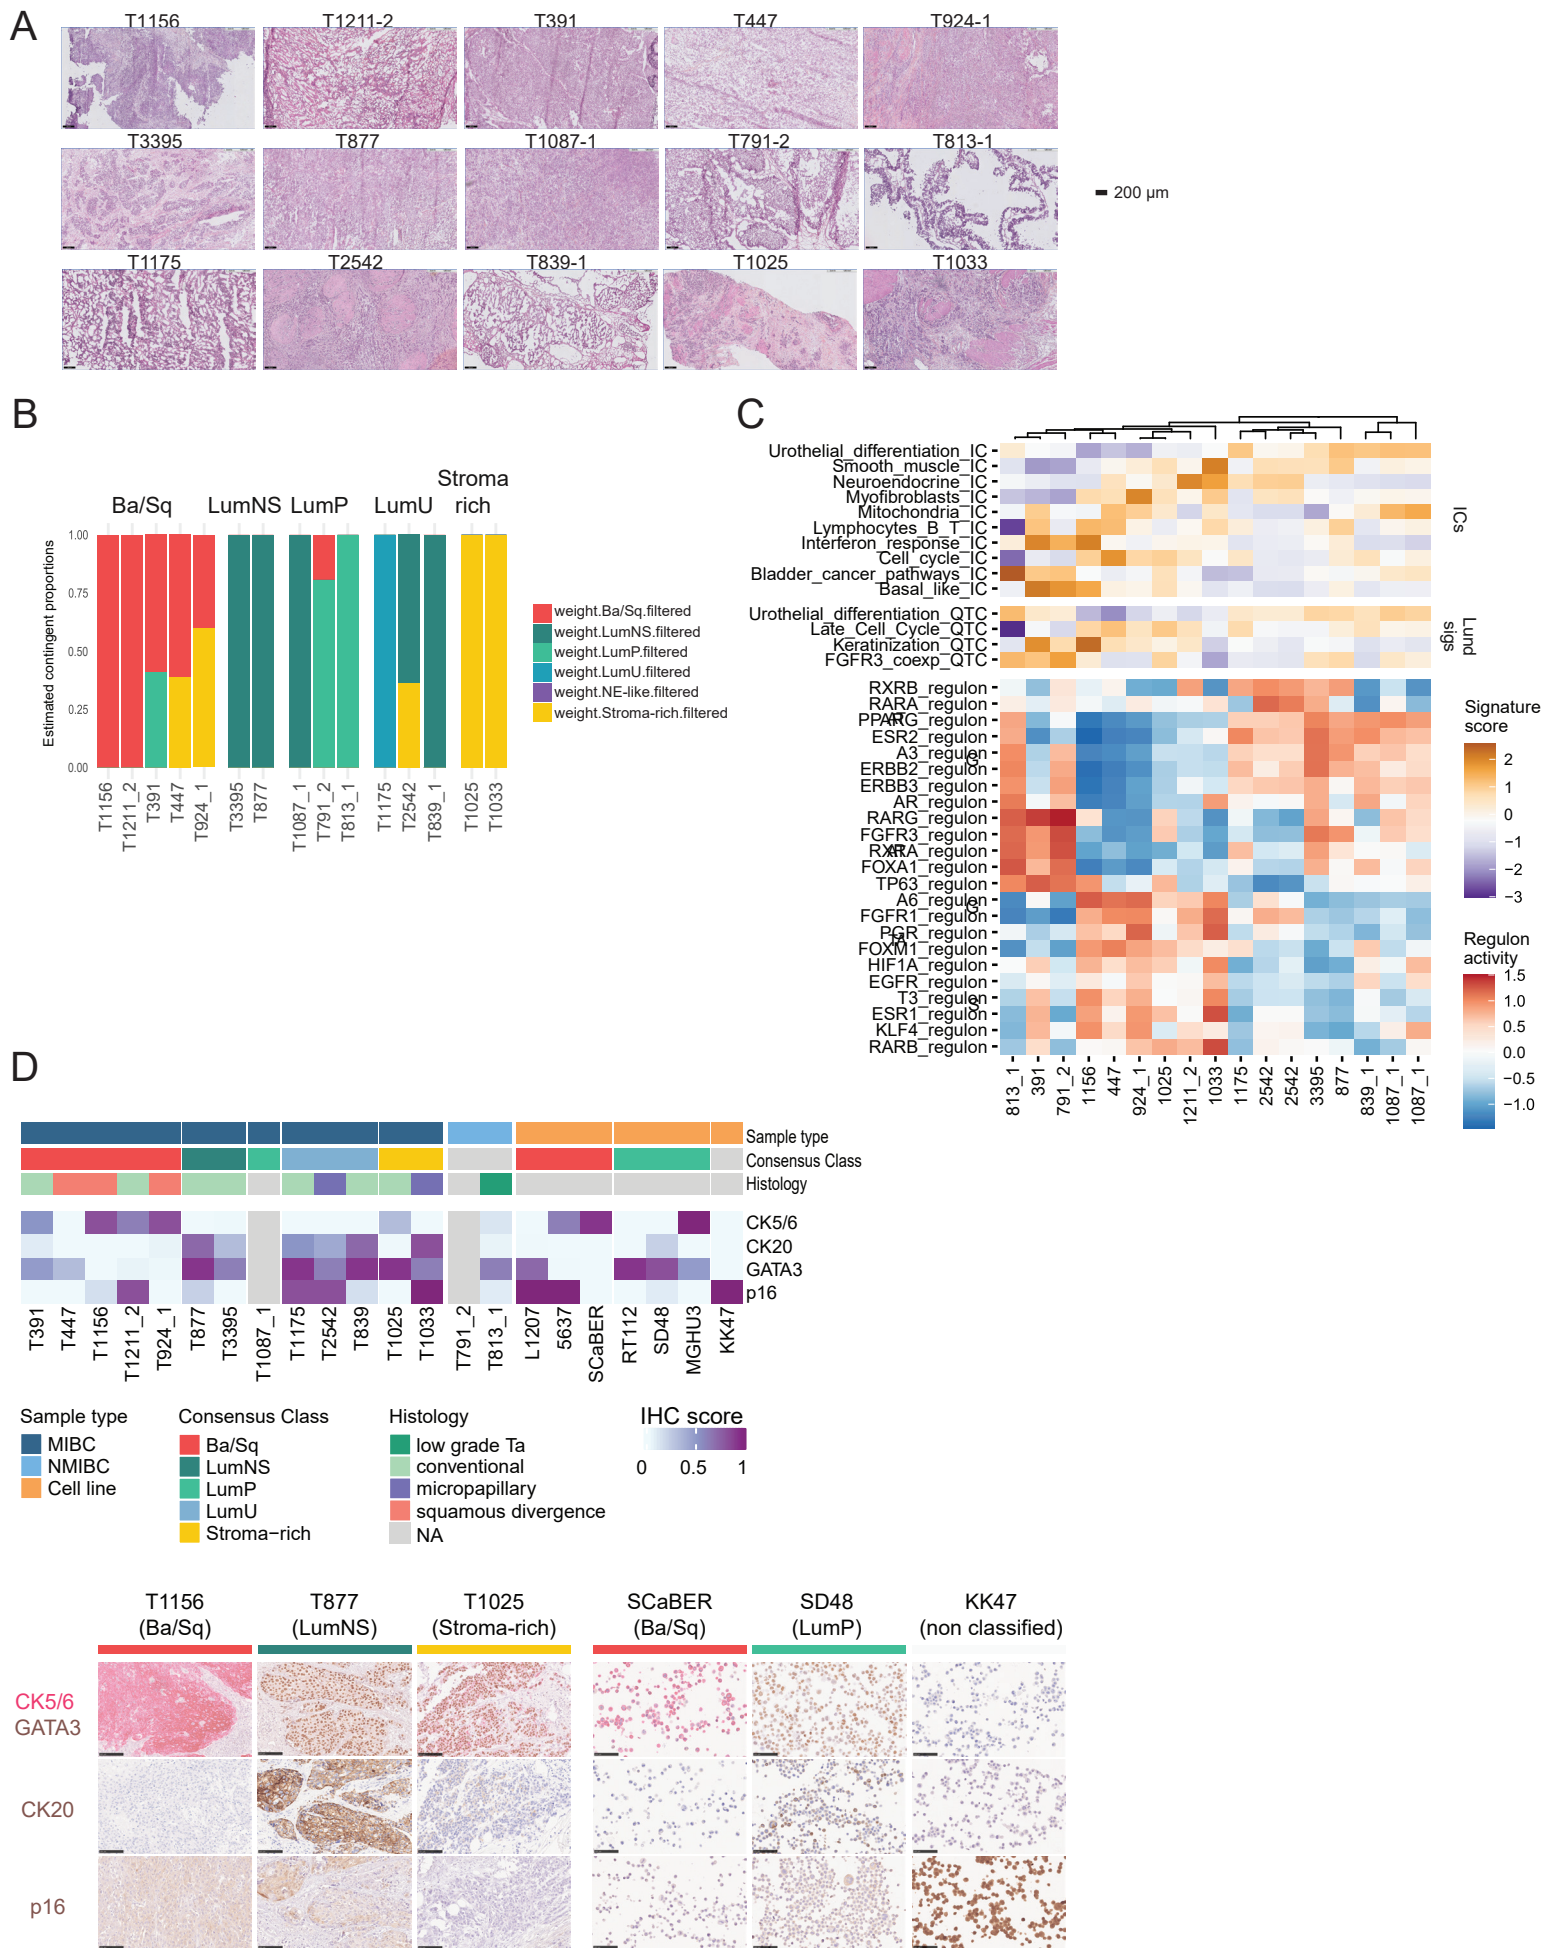

**Figure S1: Epigenetic landscape of BLCA.**

A) HES of primary tumor prior macrodissection. B) WISP analysis of primary tumors RNAseq.

C) Signature analysis of primary tumors. D) Evaluation and representative images of immunohistochemistry in our cohort using luminal (GATA3, CK20) and basal (CK5/6) subtype markers as well as p16. GATA3 (nuclear brown staining) and KRT5/6 (cytoplasmic red staining) were performed in multiplex. Scale bars : 100µm.
