# Supplementary material for: Epigenomic mapping identifies an enhancer repertoire that regulates cell identity in bladder cancer through distinct transcription factor networks
Source: PubMed Central journal article supplement (PMC10162941; doi:10.1038/s41388-023-02662-1), 2023-03-22
Supplement: 41388_2023_2662_MOESM3_ESM.pdf [file 41388_2023_2662_MOESM3_ESM.pdf]

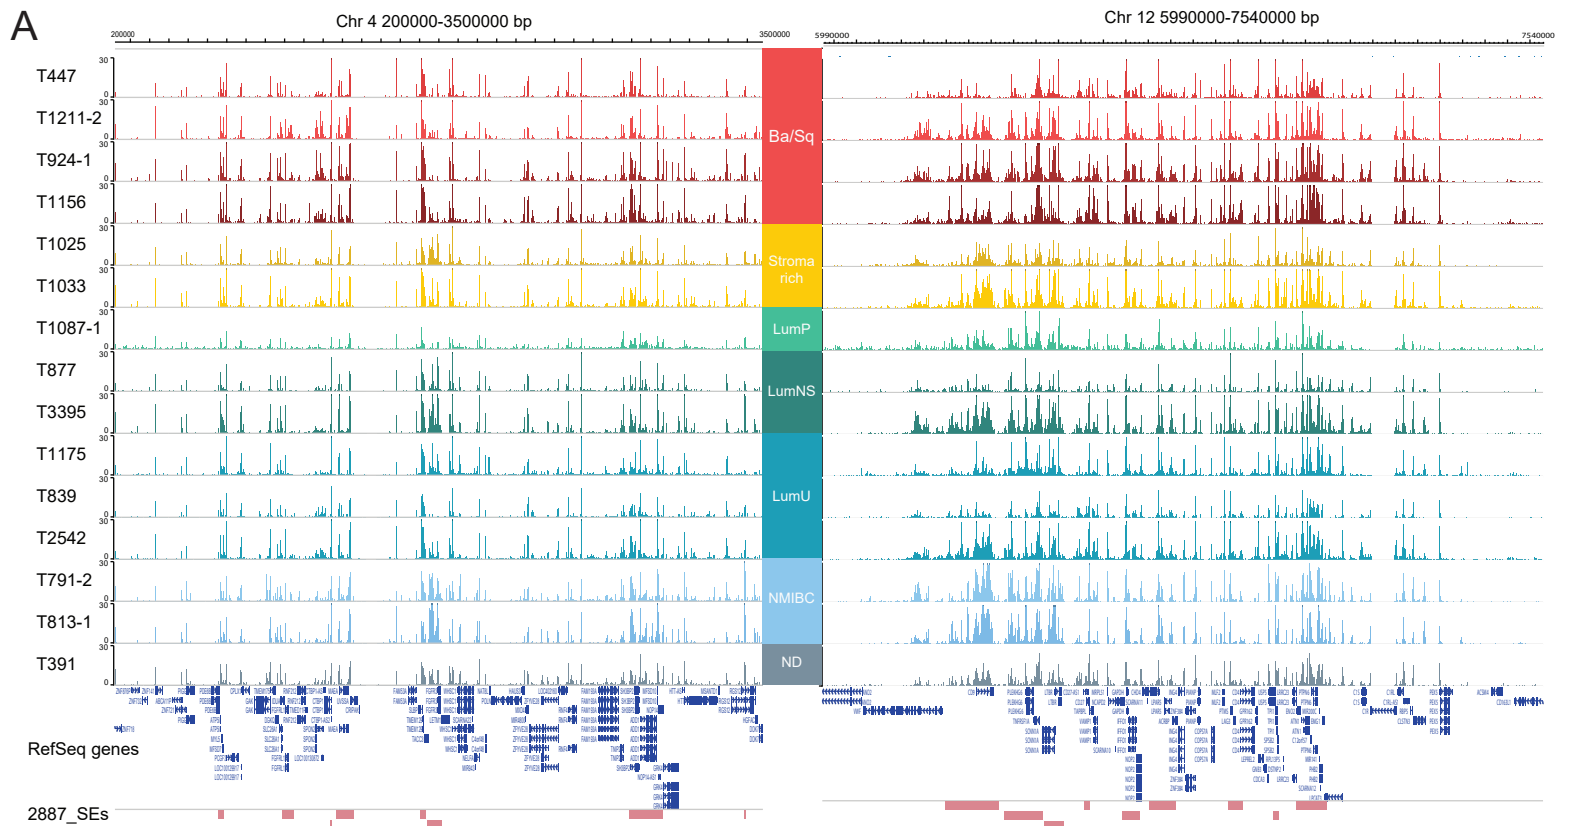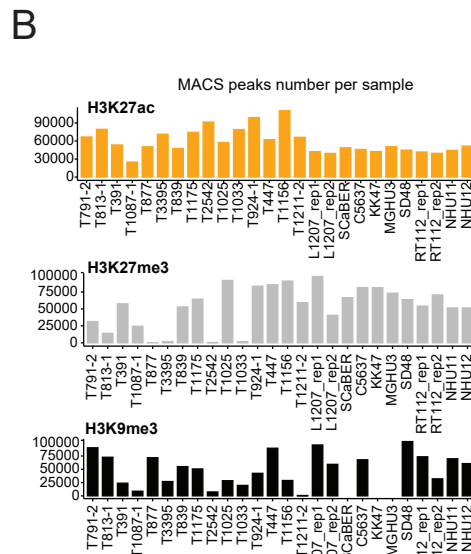

**C**

| Sample  | Mark     | Number of peaks | total read | read in peaks | FRIP     |
|---------|----------|-----------------|------------|---------------|----------|
| T1025   | H3K27ac  | 57480           | 12898446   | 6780203       | 0.52566  |
| T1033   | H3K27ac  | 79083           | 23252169   | 11227875      | 0.482874 |
| T1087-1 | H3K27ac  | 24964           | 9868799    | 2169127       | 0.219796 |
| T1156   | H3K27ac  | 110445          | 36402472   | 19359698      | 0.531824 |
| T1175   | H3K27ac  | 74464           | 28222155   | 11849954      | 0.419881 |
| T1211-2 | H3K27ac  | 66171           | 31066987   | 10117684      | 0.325673 |
| T2542   | H3K27ac  | 91628           | 26268361   | 10266973      | 0.390849 |
| T3395   | H3K27ac  | 71353           | 29813837   | 14364869      | 0.481819 |
| T391    | H3K27ac  | 57369           | 32259279   | 14840331      | 0.460033 |
| T447    | H3K27ac  | 62273           | 16511796   | 10594952      | 0.64166  |
| T791-2  | H3K27ac  | 66645           | 34200842   | 17422092      | 0.509405 |
| T813-1  | H3K27ac  | 79452           | 26769347   | 16614011      | 0.620636 |
| T839    | H3K27ac  | 47443           | 11899135   | 6135329       | 0.515611 |
| T877    | H3K27ac  | 50386           | 13253291   | 6569751       | 0.495707 |
| T924-1  | H3K27ac  | 99034           | 38174186   | 21101523      | 0.552769 |
| T1025   | H3K27me3 | 91945           | 17523244   | 6989698       | 0.398882 |
| T1033   | H3K27me3 | 1531            | 32907632   | 168192        | 0.005111 |
| T1087-1 | H3K27me3 | 24447           | 13475044   | 1492759       | 0.11078  |
| T1156   | H3K27me3 | 90948           | 23818238   | 6759895       | 0.283812 |
| T1175   | H3K27me3 | 64395           | 26637172   | 6755173       | 0.253599 |
| T1211-2 | H3K27me3 | 59279           | 32004727   | 6898519       | 0.215547 |
| T2542   | H3K27me3 | 566             | 28325631   | 172339        | 0.006084 |
| T3395   | H3K27me3 | 1863            | 25130663   | 222722        | 0.008863 |
| T391    | H3K27me3 | 57510           | 22666982   | 4802169       | 0.211857 |
| T447    | H3K27me3 | 85587           | 27760311   | 8445860       | 0.304242 |
| T791-2  | H3K27me3 | 31347           | 12101578   | 1567048       | 0.129491 |
| T813-1  | H3K27me3 | 13938           | 52702312   | 608480        | 0.011546 |
| T839    | H3K27me3 | 52912           | 13348050   | 2562277       | 0.191959 |
| T877    | H3K27me3 | 7               | 29592691   | 1016          | 3.43E-05 |
| T924-1  | H3K27me3 | 83485           | 26832708   | 6360990       | 0.237061 |
| T1025   | H3K9me3  | 28570           | 5239795    | 1250389       | 0.238633 |
| T1033   | H3K9me3  | 19704           | 37401410   | 1247093       | 0.033343 |
| T1087-1 | H3K9me3  | 8777            | 9827987    | 1104504       | 0.112384 |
| T1156   | H3K9me3  | 28957           | 20658261   | 1155253       | 0.055922 |
| T1175   | H3K9me3  | 50631           | 17941560   | 3001338       | 0.167284 |
| T1211-2 | H3K9me3  | 740             | 23536967   | 337744        | 0.01435  |
| T2542   | H3K9me3  | 7393            | 32151810   | 867307        | 0.026975 |
| T3395   | H3K9me3  | 26974           | 36299887   | 1695578       | 0.04671  |
| T391    | H3K9me3  | 23883           | 12205751   | 1353281       | 0.110872 |
| T447    | H3K9me3  | 89610           | 21470059   | 5073066       | 0.236286 |
| T791-2  | H3K9me3  | 90420           | 43887296   | 9374620       | 0.213607 |
| T813-1  | H3K9me3  | 72650           | 23474222   | 1681764       | 0.071643 |
| T839    | H3K9me3  | 55007           | 11698270   | 2449291       | 0.209372 |
| T877    | H3K9me3  | 71717           | 13963038   | 2888492       | 0.206867 |
| T924-1  | H3K9me3  | 42422           | 24931930   | 1518931       | 0.060923 |
| 5637    | H3K27ac  | 45940           | 48069709   | 20721568      | 0.431073 |
| 5637    | H3K27me3 | 81381           | 38545596   | 16184847      | 0.419888 |
| 5637    | H3K9me3  | 67899           | 38880258   | 7699164       | 0.198022 |
| KK47    | H3K27me3 | 81295           | 2927476    | 53790455      | 0.054424 |
| KK47    | H3K27ac  | 42479           | 2641660    | 49789214      | 0.053057 |
| L1207   | H3K27ac  | 49958           | 30656612   | 79371958      | 0.38624  |
| L1207   | H3K27me3 | 99012           | 28898848   | 94964172      | 0.304313 |
| L1207   | H3K9me3  | 120513          | 19348866   | 74700084      | 0.259018 |
| MGHU3   | H3K27me3 | 73221           | 1712698    | 46163480      | 0.037101 |
| MGHU3   | H3K27ac  | 50734           | 1644454    | 39826658      | 0.041289 |
| NHU11   | H3K9me3  | 69783           | 1113263    | 58946442      | 0.018886 |
| NHU11   | H3K27me3 | 51400           | 1480880    | 46449018      | 0.031882 |
| NHU11   | H3K27ac  | 44280           | 1875773    | 52280305      | 0.035879 |
| NHU12   | H3K9me3  | 60671           | 544925     | 57677279      | 0.009448 |
| NHU12   | H3K27me3 | 51384           | 1772139    | 71573711      | 0.02476  |
| NHU12   | H3K27ac  | 51542           | 1559343    | 43893510      | 0.035526 |
| RT112   | H3K27ac  | 46513           | 47340406   | 1.17E+08      | 0.40384  |
| RT112   | H3K27me3 | 118688          | 21180874   | 68708970      | 0.032629 |
| RT112   | H3K9me3  | 64029           | 9744421    | 70999979      | 0.137245 |
| SCaBER  | H3K27me3 | 66506           | 1673182    | 32874254      | 0.050896 |
| SCaBER  | H3K27ac  | 48691           | 2606122    | 53174952      | 0.04901  |
| SD48    | H3K27ac  | 44822           | 37894501   | 19850888      | 0.523846 |
| SD48    | H3K27me3 | 63627           | 76768376   | 16525476      | 0.215264 |
| SD48    | H3K9me3  | 102050          | 39382228   | 6221312       | 0.157973 |

**Figure S2: ChIPseq Quality controls**

A) Washu Epigenome browser view of H3K27ac ChIPseq in tumors (bigwig) at 2 large windows on chromosome 4 (around FGFR3 gene) and chromosome 12 (around GAPDH gene).  
 B) Macs2 Peaks number per sample for each tested histone marks. C) Fraction of Reads in Peaks statistics from MACS2 peaks.
