# Supplementary material for: Epigenomic mapping identifies an enhancer repertoire that regulates cell identity in bladder cancer through distinct transcription factor networks
Source: PubMed Central journal article supplement (PMC10162941; doi:10.1038/s41388-023-02662-1), 2023-03-22
Supplement: 41388_2023_2662_MOESM4_ESM.pdf [file 41388_2023_2662_MOESM4_ESM.pdf]

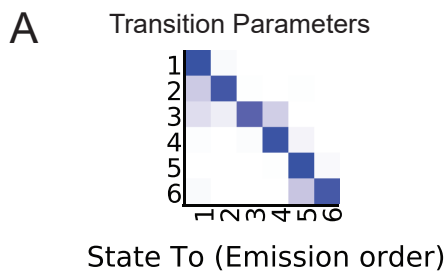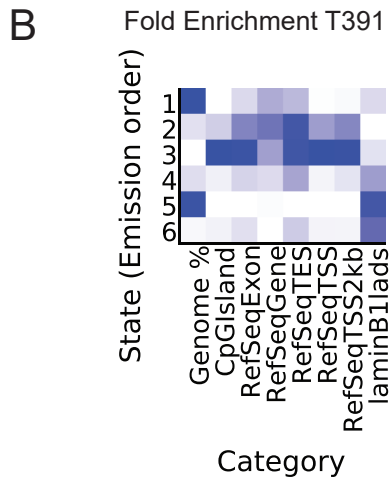

**C** Number of genes by corresponding chromatin states at the TSS in the samples analyzed

| SampleID   | Chromatin states |       |       |      |       |       |      |
|------------|------------------|-------|-------|------|-------|-------|------|
|            | E1               | E2    | E3    | E4   | E5    | E6    |      |
| Tumors     | T391             | 18208 | 15288 | 3957 | 5046  | 13327 | 1905 |
|            | T447             | 22317 | 13018 | 4554 | 4913  | 10191 | 2740 |
|            | T791             | 18281 | 16266 | 1508 | 3089  | 13998 | 4591 |
|            | T813             | 22347 | 17615 | 660  | 6878  | 7516  | 2713 |
|            | T839             | 17005 | 13413 | 4026 | 4468  | 16213 | 2607 |
|            | T877             | 19610 | 15749 | 1208 | 4921  | 13901 | 2338 |
|            | T924             | 20687 | 17859 | 2453 | 5972  | 8838  | 1919 |
|            | T1025            | 17521 | 12835 | 5371 | 6415  | 14324 | 1268 |
|            | T1033            | 22513 | 17411 | 1090 | 3812  | 10378 | 2525 |
|            | T1087            | 16023 | 11205 | 1545 | 4646  | 21957 | 2353 |
|            | T1156            | 20487 | 16521 | 3700 | 5278  | 9553  | 2191 |
|            | T1175            | 23555 | 17591 | 1932 | 5421  | 7391  | 1837 |
|            | T1211            | 25165 | 15595 | 1514 | 7841  | 6998  | 619  |
|            | T2542            | 24860 | 17683 | 1117 | 2825  | 9576  | 1673 |
| T3395      | 22156            | 17572 | 1248  | 2888 | 11655 | 2211  |      |
| Cell lines | 5637             | 17738 | 12808 | 886  | 10429 | 10975 | 4897 |
|            | KK47             | 21568 | 13365 | 798  | 10934 | 10457 | 611  |
|            | L1207            | 15053 | 14311 | 1210 | 12992 | 8377  | 5788 |
|            | MGHU3            | 24841 | 13559 | 336  | 8701  | 9577  | 719  |
|            | NHU121621        | 16746 | 13278 | 2040 | 9808  | 9349  | 6511 |
|            | NHU161130        | 16851 | 13031 | 2959 | 8665  | 9755  | 6469 |
|            | RT112            | 14143 | 12719 | 2382 | 12746 | 11876 | 3861 |
|            | Scabber          | 24777 | 14638 | 819  | 8398  | 8618  | 483  |
|            | SD48             | 15273 | 10536 | 2757 | 10649 | 13771 | 4742 |

TSS, transcription start site

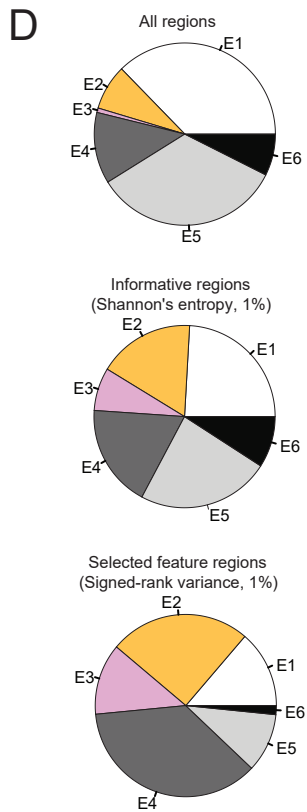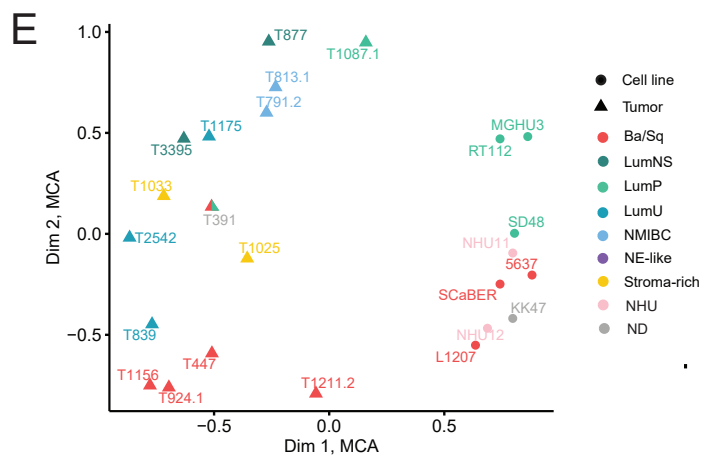

### Figure S3: Chromatin State Map of BLCA

A) Transition parameters from CHromHMM state output.

B) ChromHMM output, example of Fold enrichment over genome categories (Tumour T391)

C) Number of genes by corresponding chromatin states at the TSS in the samples analyzed.

D) Pie chart illustrating chromatin state of all regions (entire genome), informative regions and top 1% varying regions by signed-rank.

E) MCA of Chromatin states on 1% most varying genome segments.
