# Supplementary material for: Epigenomic mapping identifies an enhancer repertoire that regulates cell identity in bladder cancer through distinct transcription factor networks
Source: PubMed Central journal article supplement (PMC10162941; doi:10.1038/s41388-023-02662-1), 2023-03-22
Supplement: 41388_2023_2662_MOESM7_ESM.pdf [file 41388_2023_2662_MOESM7_ESM.pdf]

A

## MACS FOXA1 Peak Model

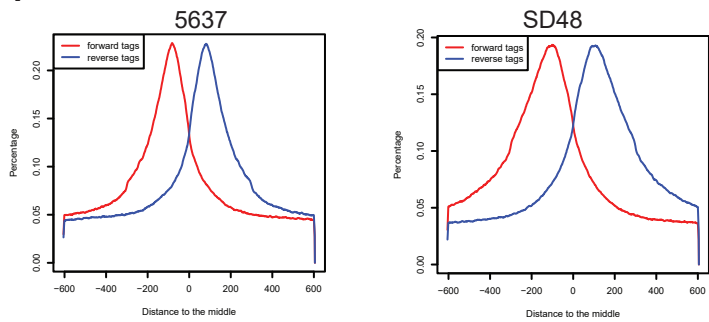

| Sample | Mark    | Number of peaks | total read | read in peaks | FRiP            |
|--------|---------|-----------------|------------|---------------|-----------------|
| 5637   | FOXA1   | 39445           | 60479137   | 6625091       | <b>0.109543</b> |
| SD48   | FOXA1   | 61083           | 36509534   | 16078870      | <b>0.440402</b> |
| 5637   | CTCF    | 57615           | 47101873   | 10581044      | <b>0.224642</b> |
| SD48   | CTCF    | 59867           | 40490172   | 10851842      | <b>0.268012</b> |
| 5637   | H3K27ac | 45940           | 48069709   | 20721568      | <b>0.431073</b> |
| SD48   | H3K27ac | 44822           | 37894501   | 19850888      | <b>0.523846</b> |
| 5637   | H3K4me3 | 17321           | 54778008   | 48037860      | <b>0.876955</b> |
| SD48   | H3K4me3 | 19852           | 55411490   | 39518632      | <b>0.713185</b> |

B

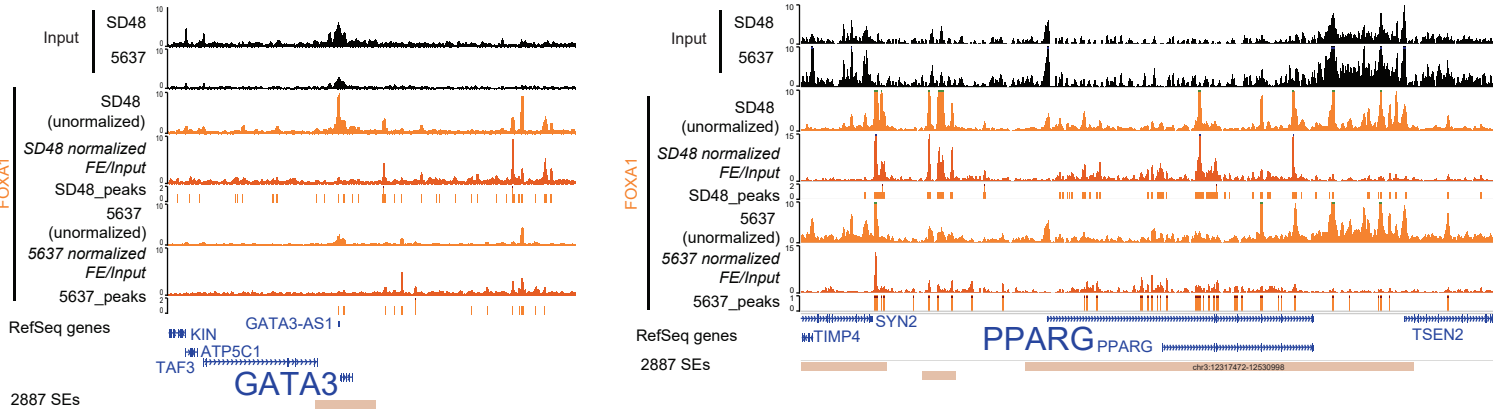

C

## Genomic localisation FOXA1

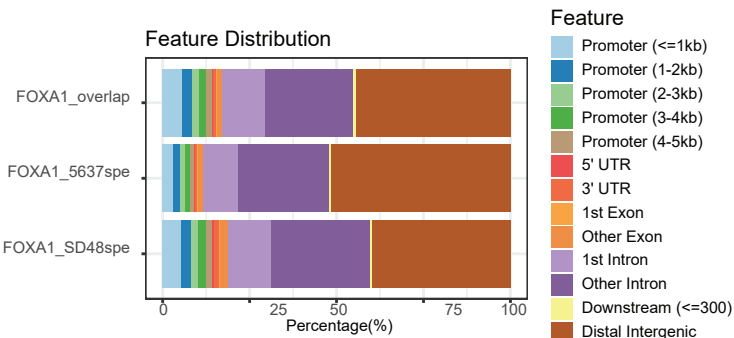

D

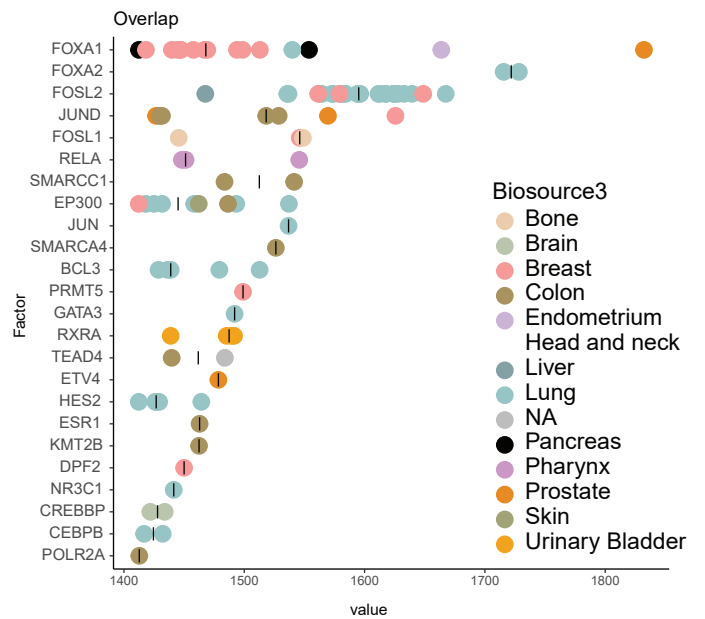

E

Homer motif enrichment FOXA1  
SD48 specific peaks over 5637 specific peaks

| Motif Name      |                                  | Log P-value |
|-----------------|----------------------------------|-------------|
| Foxa2(Forkhead) | Liver-Foxa2-ChIP-Seq(GSE25694)   | -3.38E+03   |
| GATA3(Zf)       | iTreg-Gata3-ChIP-Seq(GSE20898)   | -3.31E+03   |
| FOXA1(Forkhead) | LNCAP-FOXA1-ChIP-Seq(GSE27824)   | -3.28E+03   |
| TRPS1(Zf)       | MCF7-TRPS1-ChIP-Seq(GSE107013)   | -3.12E+03   |
| FOXK1(Forkhead) | HEK293-FOXK1-ChIP-Seq(GSE51673)  | -3.12E+03   |
| FOXA1(Forkhead) | MCF7-FOXA1-ChIP-Seq(GSE26831)    | -3.06E+03   |
| FoxL2(Forkhead) | Ovary-FoxL2-ChIP-Seq(GSE60858)   | -3.05E+03   |
| FOXK2(Forkhead) | U2OS-FOXK2-ChIP-Seq(E-MTAB-2204) | -2.93E+03   |
| Gata6(Zf)       | HUG1N-GATA6-ChIP-Seq(GSE51936)   | -2.78E+03   |

F

Homer motif enrichment FOXA1  
5637 specific peaks over SD48 specific peaks

| Motif Name    |                                        | Log P-value |
|---------------|----------------------------------------|-------------|
| Fra1(bZIP)    | BT549-Fra1-ChIP-Seq(GSE46166)          | -1.27E+03   |
| Fos(bZIP)     | TSC-Fos-ChIP-Seq(GSE110950)            | -1.27E+03   |
| Fra2(bZIP)    | Striatum-Fra2-ChIP-Seq(GSE43429)       | -1.23E+03   |
| JunB(bZIP)    | DendriticCells-Junb-ChIP-Seq(GSE36099) | -1.20E+03   |
| Atf3(bZIP)    | GBM-ATF3-ChIP-Seq(GSE33912)            | -1.20E+03   |
| BATF(bZIP)    | Th17-BATF-ChIP-Seq(GSE39756)           | -1.14E+03   |
| AP-1(bZIP)    | ThioMac-PU.1-ChIP-Seq(GSE21512)        | -1.11E+03   |
| Fosl2(bZIP)   | 3T3L1-Fosl2-ChIP-Seq(GSE56872)         | -1.06E+03   |
| Jun-AP1(bZIP) | K562-c-Jun-ChIP-Seq(GSE31477)          | -9.24E+02   |

## Figure S6: FOXA1 binding profile

A) MACS2 peakcalling in SD48 and 5637 statistics: Peak models for FOXA1 and FRiP (Fraction of Reads in Peaks). B) Examples washu genome browser view of Input, FOXA1 ChIPseq reads (raw bigwig as well as Fold enrichment compared to Input) and MAC2 called peaks at *GATA3* and *PPARg* genes. C) Genomic localisation of FOXA1 peaks. D) Cistrome ChIPseq enrichment analysis of 5637 and SD48 FOXA1 overlapping peaks. E) Homer motif enrichment analysis of FOXA1 SD48 specific FOXA1 peaks versus 5637 specific peaks. F) Homer motif enrichment analysis of FOXA1 5637 specific FOXA1 peaks versus SD48 specific peaks.
