# Supplementary material for: Epigenomic mapping identifies an enhancer repertoire that regulates cell identity in bladder cancer through distinct transcription factor networks
Source: PubMed Central journal article supplement (PMC10162941; doi:10.1038/s41388-023-02662-1), 2023-03-22
Supplement: 41388_2023_2662_MOESM9_ESM.pdf [file 41388_2023_2662_MOESM9_ESM.pdf]

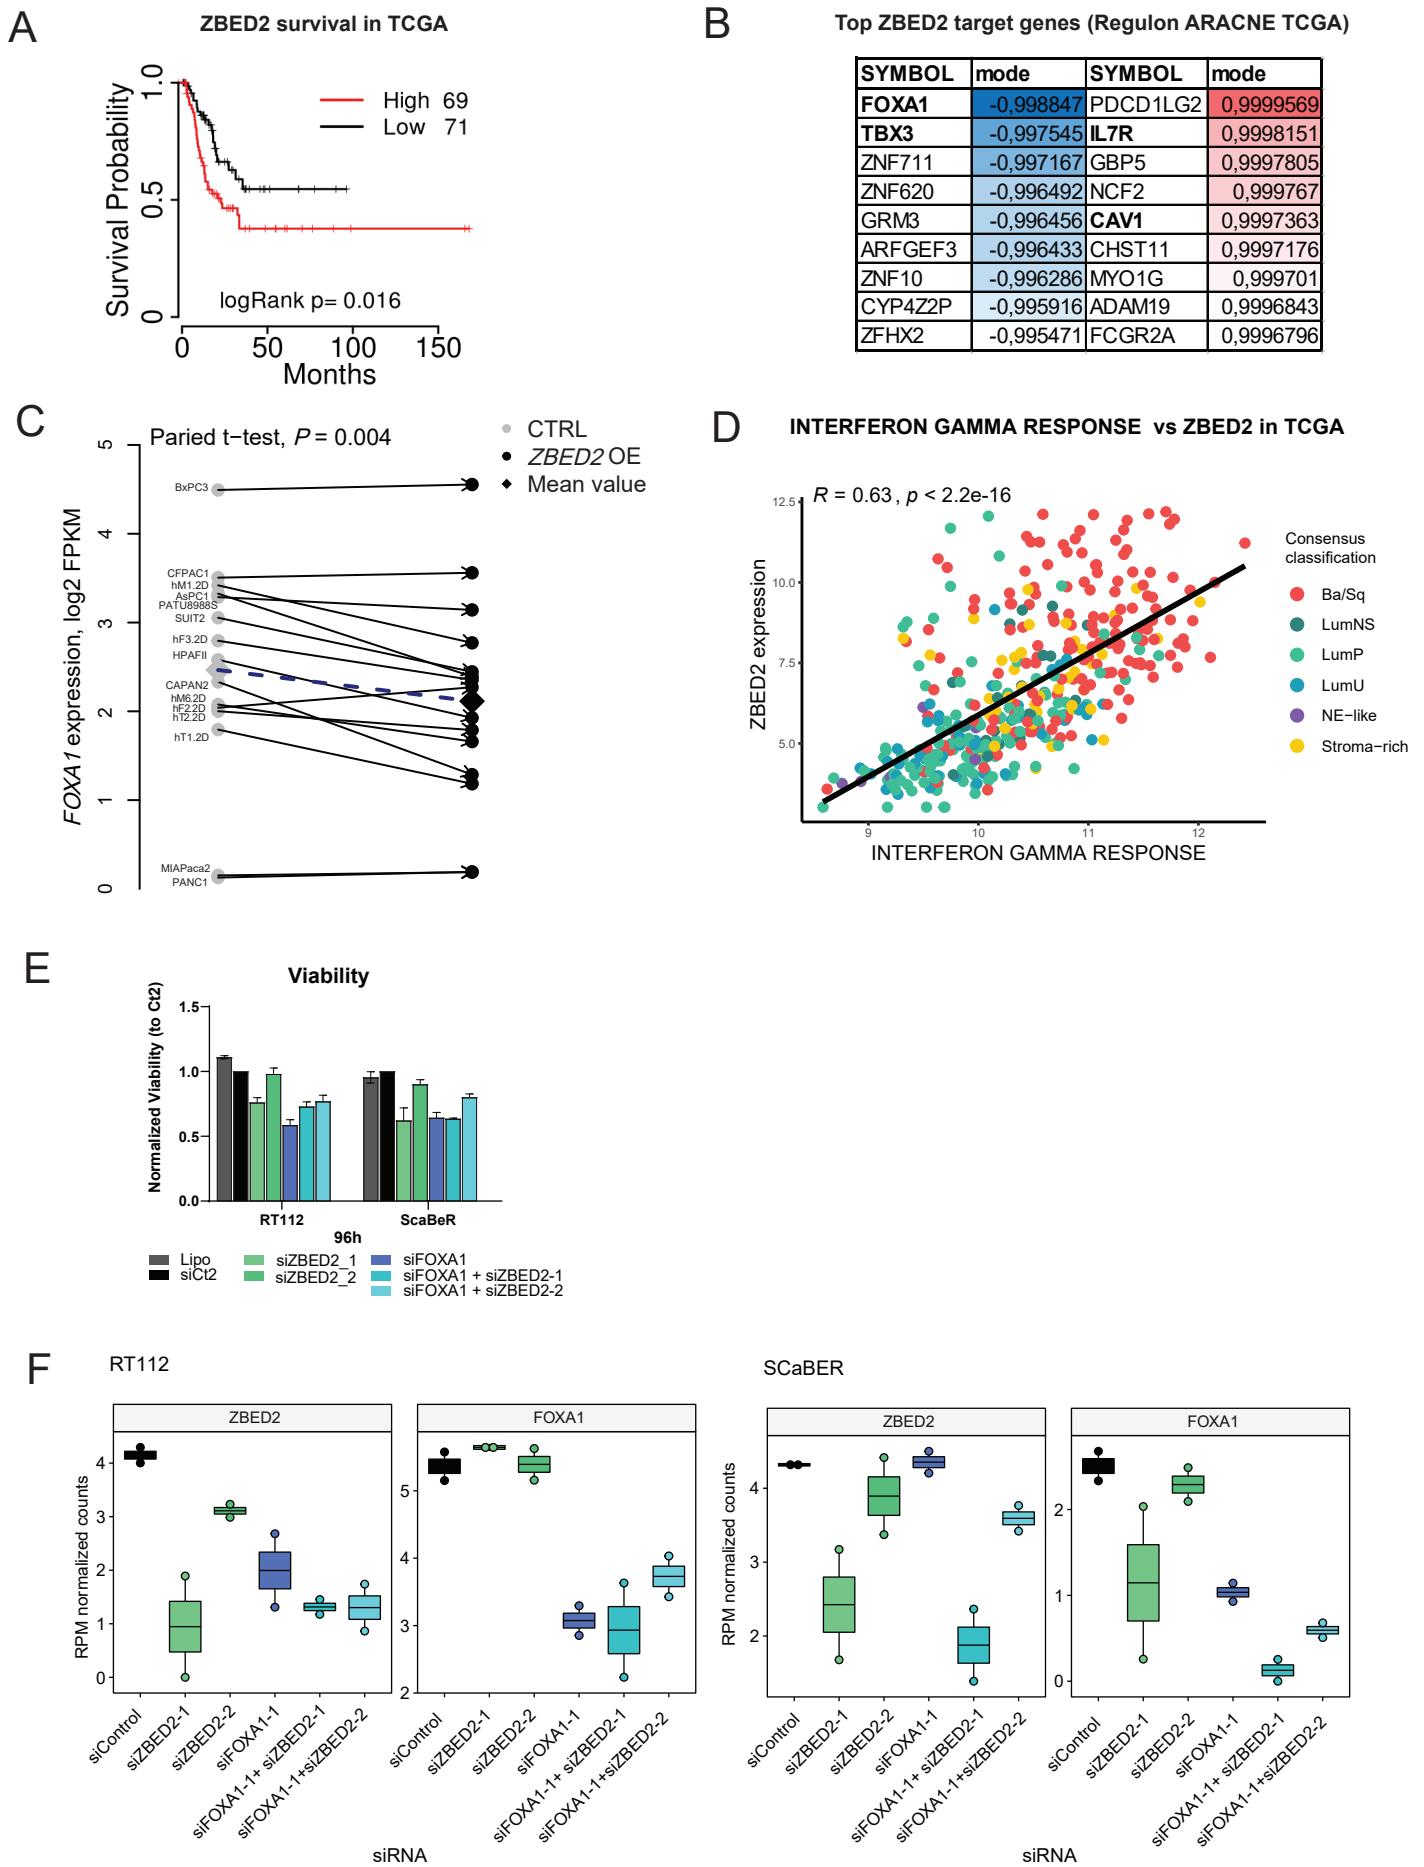

**Figure S8: ZBED2, a novel Basal-associated TF involved in inflammation dampening**  
 A) Overall survival compared to ZBED2 expression in TCGA cohort (Mean +/- sd). B) Top ZBED2 target genes predicted by ARACNE from TCGA regulon. C) Statistical analysis of FOXA1 expression in 15 Pancreatic cell lines (GSE141607). D) Expression correlation of ZBED2 with Interferon Gamma response (Hallmark) in TCGA cohort. E) Viability assay of RT112 and SCaBER upon siRNA treatments (n=2). F) 3' seq analysis of RT112 and SCaBER after siRNA treatment against ZBED2 and FOXA1.
